# Supplementary material for: Rainbow Trout (Oncorhynchus mykiss) Na+/H+ Exchangers tNhe3a and tNhe3b Display Unique Inhibitory Profiles Dissimilar from Mammalian NHE Isoforms
Source: MDPI journal article supplement (doi:10.3390/ijms22042205), 2021-02-23
Supplement: s1 [file s1]

## 10 Supplemental Figures

Trout\_Nhe3a 1 MACRTCLWLLG...TTFFTC...TVRLVVEGTEVGATQGSQP...EPGVVGSNHSQAGGG..H  
Trout\_Nhe3b 1 MPA...LWR...STFVLV...MVLTAIS...RPSLASEATGN.GT  
Zebrafish\_Nhe3a 1 MASSTYICLLR...AAFLVC...LVPLVKNSV...EVNPHHQGTEN...  
Zebrafish\_Nhe3b 1 AFSTLLL...AFLLVS...LHEAAAGLDFYGAEGQN...YSSRSSAEGGASGNSH  
Human\_NHE3 1 MWGLGARGPDR...GLLLA...LALGGLARAGGVEV...EPGAGHGESG...  
Squalus\_Nhe3 1 MGRDRSECAAR...CALLLA...LGLLLCCPVAPSSVEEA...EHGESHGESHGGNET  
Human\_NHE1 1 MVLRSGLICGLSPHRIFPSL...LVVVALVGL...LPVLRSHQLQLSPTASTIRSEPPRRSISGDVTITAPPEVTPESRPVNHHSVDHG...

Trout\_Nhe3a 53 GSSISGIGIVTFKWHHEAPYLIALWILVACVSMVVEENHSLTSVIDSAALLHICWIIICGFIYGADKKMOT...TLPFTVDFEY  
Trout\_Nhe3b 33 EHTITLPIVIVKWEIEHPYLVALLWVLSWLCILVFQNLNCLTRVIPSGLIICWIIICGFIYGADKKVOT...RLOPFTFFEY  
Zebrafish\_Nhe3a 41 ...LTGLPIVTFKWHHEVETPYLVALLWVFAVLAKISVIOLNHSITGVFIPESGLIICWIIICGFIYGADKKVOT...RLOPFTFFEY  
Zebrafish\_Nhe3b 53 SATITLPIVTFKWHHEVETPYLVALLWILTCWICILVTELNHSITGVFIPESGLIICWIIICGFIYGADKKVOT...RLOPFTFFEY  
Human\_NHE3 41 ...GFQVVTFFWAHVQDPYVIALWILVSLANILGFHLSKHTSVVPSALLIICWIIICGFIYGADKKVOT...RLOPFTFFEY  
Squalus\_Nhe3 50 GDHEQGFHVTFHWHVQAPYVIALWILVSLANILGFHLSKHTSVVPSALLIICWIIICGFIYGADKKVOT...RLOPFTFFEY  
Human\_NHE1 83 MKPRKAFPNVGLIDYTHVTFEISLWILLACLMILGFHVLPVLSISIVPSGLIICWIIICGFIYGADKKVOT...RLOPFTFFEY

Trout\_Nhe3a 137 LPQVILDAGYFMPNKLFPENMGAILVYAVICTCWNAAVGLGLWGCWLGCGMGDIDICHLQFLFLFCGLIAAVDPVAVAVFEEVH  
Trout\_Nhe3b 117 LPQVILDAGYFMPNKLFPENMGAILVYAVICTCWNAAVGLGLWGCWLGCGMGDIDITGLQLFLFLFCGLIAAVDPVAVAVFEEVH  
Zebrafish\_Nhe3a 123 LPQVILDAGYFMPNKLFPENMGAILVYAVICTCWNAAVGLGLWGCWLGCGMGDLNIGHLQFLFLFCGLIAAVDPVAVAVFEEVH  
Zebrafish\_Nhe3b 137 LPQVILDAGYFMPNKLFPENMGAILVYAVICTCWNAAVGLGLWGCWLGCGMGDLNIGHLQFLFLFCGLIAAVDPVAVAVFEEVH  
Human\_NHE3 120 LPQVILDAGYFMPNKLFPENMGAILVYAVICTCWNAAVGLGLWGCWLGCGMGDLNIGHLQFLFLFCGLIAAVDPVAVAVFEEVH  
Squalus\_Nhe3 134 LPQVILDAGYFMPNKLFPENMGAILVYAVICTCWNAAVGLGLWGCWLGCGMGDLNIGHLQFLFLFCGLIAAVDPVAVAVFEEVH  
Human\_NHE1 166 LPQVILDAGYFMPNKLFPENMGAILVYAVICTCWNAAVGLGLWGCWLGCGMGDLNIGHLQFLFLFCGLIAAVDPVAVAVFEEVH

Trout\_Nhe3a 222 VNEVLEIVFGESLLNDGVTVVLENVFPAFVSLGGAETDAVEIIRKGIISFVVAVGGSLVGVVFALLISLLTRCTKNITQIEPFG  
Trout\_Nhe3b 202 VNEVLEIVFGESLLNDGVTVVLENVFPAFVSLGGAETDAVEIIRKGIISFVVAVGGSLVGVVFALLISLLTRCTKNITQIEPFG  
Zebrafish\_Nhe3a 208 VNEVLEIVFGESLLNDGVTVVLENVFPAFVSLGGAETDAVEIIRKGIISFVVAVGGSLVGVVFALLISLLTRCTKNITQIEPFG  
Zebrafish\_Nhe3b 222 VNEVLEIVFGESLLNDGVTVVLENVFPAFVSLGGAETDAVEIIRKGIISFVVAVGGSLVGVVFALLISLLTRCTKNITQIEPFG  
Human\_NHE3 205 VNEVLEIVFGESLLNDGVTVVLENVFPAFVSLGGAETDAVEIIRKGIISFVVAVGGSLVGVVFALLISLLTRCTKNITQIEPFG  
Squalus\_Nhe3 219 VNEVLEIVFGESLLNDGVTVVLENVFPAFVSLGGAETDAVEIIRKGIISFVVAVGGSLVGVVFALLISLLTRCTKNITQIEPFG  
Human\_NHE1 251 VNEVLEIVFGESLLNDGVTVVLENVFPAFVSLGGAETDAVEIIRKGIISFVVAVGGSLVGVVFALLISLLTRCTKNITQIEPFG

Trout\_Nhe3a 307 IFILGYSYLTAEMLSLSAITLSIVFCGICSOXYKANMDERSVTTVRYVMKVFANGSETHIFPLGISAIDPAVWVNTGFILLT  
Trout\_Nhe3b 287 IFILGYSYLTAEMLSLSAITLSIVFCGICSOXYKANMDERSVTTVRYVMKVFANGSETHIFPLGISAIDPAVWVNTGFILLT  
Zebrafish\_Nhe3a 293 VFLVGYYSYLTAEMLSLSAITLSIVFCGICSOXYKANMDERSVTTVRYVMKVFANGSETHIFPLGISAIDPAVWVNTGFILLT  
Zebrafish\_Nhe3b 307 IIVLGYSYLTAEMLSLSAITLSIVFCGICSOXYKANMDERSVTTVRYVMKVFANGSETHIFPLGISAIDPAVWVNTGFILLT  
Human\_NHE3 290 VFIIISYLSYLTAEMLSLSAITLSIVFCGICSOXYKANMDERSVTTVRYVMKVFANGSETHIFPLGISAIDPAVWVNTGFILLT  
Squalus\_Nhe3 304 VFIIISYLSYLTAEMLSLSAITLSIVFCGICSOXYKANMDERSVTTVRYVMKVFANGSETHIFPLGISAIDPAVWVNTGFILLT  
Human\_NHE1 334 VFLYSYSAITAEMLSLSAITLSIVFCGICSOXYKANMDERSVTTVRYVMKVFANGSETHIFPLGISAIDPAVWVNTGFILLT

Trout\_Nhe3a 392 LFFIFVRFICGVPLTWINKYRHPLEFDQVVMYSYGLRGAVAYGLVAMPGENKFKKMLVSTTLLIVVYFTVMIOGTHMKPL  
Trout\_Nhe3b 372 LFFIFVRFICGVPLTWINKYRHPLEFDQVVMYSYGLRGAVAYGLVLLDENKYKKEKLMISTTLLIVVYFTVMIOGTHMKPL  
Zebrafish\_Nhe3a 378 LFFIFVRFICGVPLTWINKYRHPLEFDQVVMYSYGLRGAVAYGLAAMLDENKYEKKLMISTTLLIVVYFTVMIOGTHMKPL  
Zebrafish\_Nhe3b 392 LFFIFVRFICGVPLTWINKYRHPLEFDQVVMYSYGLRGAVAYGLAAMLDENKYEKKLMISTTLLIVVYFTVMIOGTHMKPL  
Human\_NHE3 375 LFFIFVRFICGVPLTWINKYRHPLEFDQVVMYSYGLRGAVAYGLVLLDENKYKKEKLMISTTLLIVVYFTVMIOGTHMKPL  
Squalus\_Nhe3 389 LFFIFVRFICGVPLTWINKYRHPLEFDQVVMYSYGLRGAVAYGLVLLDENKYKKEKLMISTTLLIVVYFTVMIOGTHMKPL  
Human\_NHE1 418 LFFIFVRFICGVPLTWINKYRHPLEFDQVVMYSYGLRGAVAYGLVLLDENKYKKEKLMISTTLLIVVYFTVMIOGTHMKPL

Trout\_Nhe3a 477 VNLKVKRAAVTELTAEKTONRTFDBMLVAIEDISGQGHNYMRDKWNNFERWLCWFLMKPSARKSRDYTFNIFHOLNLKDA  
Trout\_Nhe3b 457 VNLKVKRAAVSERITAEKTONRTFDBMLVAIEDISGQGHNYMRDKWNNFERWLCWFLMKPSARKSRDYTFNIFHOLNLKDA  
Zebrafish\_Nhe3a 463 VNLKVKRAAVSDTLKLEKLNRRVFEHTIGMDISGRGDNWWTIRGWNRFEEKYISWLLMKPKARKNRDYTFNIFHOLNLKDA  
Zebrafish\_Nhe3b 477 VNLKVKRAATQSDTLKLEKLNRRVFEHTIGMDISGRGDNWWTIRGWNRFEEKYISWLLMKPKARKNRDYTFNIFHOLNLKDA  
Human\_NHE3 460 VNLKVKRSEHREPLNEKLEKLNRRVFEHTIGMDISGRGDNWWTIRGWNRFEEKYISWLLMKPKARKNRDYTFNIFHOLNLKDA  
Squalus\_Nhe3 474 VNLKVKRKSOKDPLNEKLEKLNRRVFEHTIGMDISGRGDNWWTIRGWNRFEEKYISWLLMKPKARKNRDYTFNIFHOLNLKDA  
Human\_NHE1 503 VDLAVKKQETKRSINEEHTQFLDLTLGIEDICGHYHHHWKDKLNRFNKKYVKKCLTAGE.RSKPPQLIAFYHKKMEMKQAL

```

Trout_Nhe3a      562 SYVKEGERRGSLAFVRNETK...ADVDFNKKFRASFSEIMPDIMAD...NMGPDHVPVLSSTLQDIPVSVCLVMHEQDLT...MR
Trout_Nhe3b      542 SYVKEGERRGSLAFVRNENK...ADVDFNKKFGADFSEMPYIMTE...NMGPDHVPVSSILRDSVPSVCLDMHEQDLK...MR
Zebrafish_Nhe3a  548 NYVSEGERGSLAFIRNDEA...ANVDFKKQFDSEFADVMPDIMVDSNYDFGIENISAAAIVKDTIPSVSLDIHQDQGM...N
Zebrafish_Nhe3b  562 KYVNEGESKSLAFIRSIDS...ASVDFKKKLALAYADIIIDIMADMSEYDFDIDSVPTSVMKNPISVSLDIHQDQGM...G
Human_NHE3       545 SYVKEGERRGSLAFIRSFSTDNVNVDFTE...P...RSTTVEASVSYLLRENVSAVCLDMQSLERARRSIR
Squalus_Nhe3     559 SYVSEGERGSLAFIRSSSD...VNVDFTE...P...RHSVVDSSVSAVLRSSASEVCLDMHAYENRVKSVK
Human_NHE1       587 ELVFS...GGMGKIPSAVS...VSMQ...P...NIHPKSLPSEIE...PALSKDKEEIRK...

Trout_Nhe3a      637 ESDFNAHHLQOHHYRGRKQHRHRSRSHDETNRDENEVQEIFQRTMRSRLSEFSAKMGVAFAPKKIQTKHQKDKPQV...
Trout_Nhe3b      617 ESDFDAHHLQOHHYRGRKQHRHRSRSHDETNRDENEVQEIFQRTMRSRLSEFSAKMGVAFAPKKIQTKHQKDKPQV...
Zebrafish_Nhe3a  626 VVDDINAHHLQOHHYRGRKQHRHRSRSHSFINSQSEEVQEIFQRTMRSRLSEFSAKMGVAFAPKKIQTKHQKDKPQV...
Zebrafish_Nhe3b  640 MSNDLNHHLQOHHYRGRKQHRHRSRSHNTSENPDEMDEQEIFQRTMGNLESAKMGVAFAPKKIQTKHQKDKPQV...
Human_NHE3       622 DRSETVTHHMLQOHHYRGRKQRYRLNSRSHKLMRNEDVKQDKEIFQRTMKNRLSEFSAKMGVAFAPKKIQTKHQKDKPQV...
Human_NHE1       634 ...TNRNNHHTLQOHHYRGRKQHRHRSRSHNTLVADPYEAWNQMLLRQKARQLEKINNYLTVPAPKKIQTKHQKDKPQV...

Trout_Nhe3a      718 ...NGKSTONS...KSHAYGDEDFEFSEGSASGYDAA...GGGFPMRAY...RGAGIV...PAPFMAEM...DMDMPFPMQQIP
Trout_Nhe3b      697 ...NGHTEGNG...YLYGDE...EADSVGADGA...ISSTFMRDTYKMGAGIE...PVPMPDM...DSP...VHSPVHS
Zebrafish_Nhe3a  706 ...NGKPADPN...RDHLYGDEDFEF...SADSSASSENT...CQFPRVINTTCAGVD...NPATPEL...D...SPSMRNP
Zebrafish_Nhe3b  720 ...NGKPADPN...RDHLYGDEDFEF...SADSSASSENT...CQFPRVINTTCAGVD...NPATPEL...D...SPSMRNP
Human_NHE3       693 SIPNGKLPMEPAQNFTIKEDLELSDTEPPNYDEEMSGGIEFLASVTKDTASDSPAGID...NPVFSPPDEALDR...SLLARLP
Squalus_Nhe3     705 AVPNGRRLSTQS...VTFHVDK...DSDEVEDNYDPS.DGGISFLITAPSEETDETRTGID...NPVFSAAEE...DQ...SFYQMIP
Human_NHE1       698 ...RARIGSDP...LAYEPK...DLPVITIDPASQSPSE...SVDLVNEELKGVVGLSRDPAKVAEE...DE...

Trout_Nhe3a      728 ...RVRFHSPDLTGNVVCMLC...I.NFWLCHF...
Trout_Nhe3b      766 SWLAETEVDSSNMVPSQRAQLRLPWPSPNLRRLAPLCSTHNSDSFLLADSPATQEGISELPFPPPPQDGGCQGGTH...K
Zebrafish_Nhe3a  766 PWLLETEM...SVAPSQRAQRRLPWPDPN...RRLAPMRISTCSTDSFLMADVSSSTLE...VHEEOPQSDNGESVF...E
Zebrafish_Nhe3b  784 PWQTEIGHN.TAVAPSQRAQRRLPWPDPN...RRLAPMRISTCSTDSFLMADVSSSTLE...VHEEOPQSDNGESVF...E
Human_NHE3       773 PWLSPGE...TVVPSQARLQIPYSPGTFCRLMPFLSSKSVDSFLQADGP...EERFPAAALFESTH...M
Squalus_Nhe3     774 PWMSNEE...TVVPSQARLQIPYSPGTFCRLMPFLSSKSVDSFLQADGP...EERFPAAALFESTH...M
Human_NHE1       757 ...DDGGGIMMRSETISGGLDDVETPAPSDSPSQRIQRC...SD...PGHPPEPFGCEPFFPKGQ

```

**Supplemental Figure 1. Alignment of NHE proteins.** Alignment of trout, zebrafish, human NHE1, and NHE1 and Squalus NHE3 protein. Conserved amino acids are colored red and conserved regions are boxed. White amino acids boxed in red represent regions of identity. Representatives included are; *Oncorhynchus mykiss*, Nhe3a, NM\_001130995; Nhe3b, FJ376630.1; *Danio rerio*, Nhe3a, EF591984.1; Nhe3B, EF591980.1; *Homo sapiens*, NHE3, NG\_046804.1; *Squalus suckleyi*, Nhe3, KR297236.1; *Homo sapiens*, NHE1, NM\_003047. Amino acid alignment was using the MAFFT program [75].

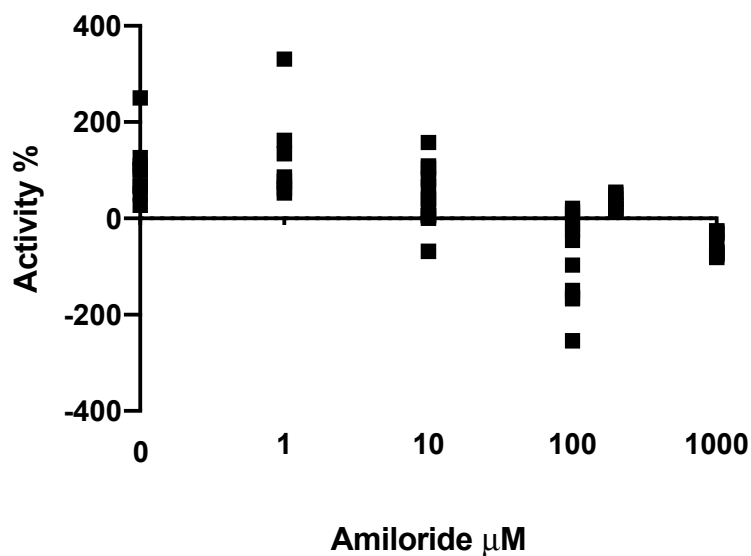

Supplemental Figure 2. Raw data points associated with Figure 5 (Effect of varying concentrations of amiloride on activity of tNhe3a). Each individual data point is relative to the mean of the control (DMSO) which was normalized to 100% activity.

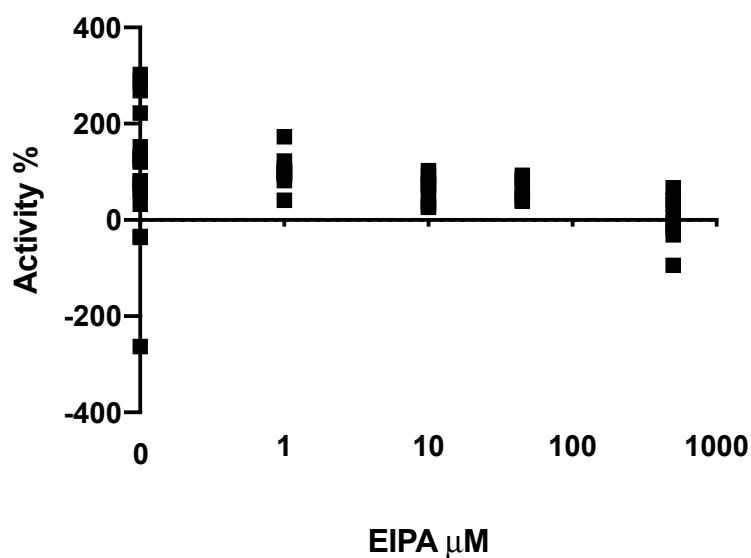

Supplemental Figure 3. Raw data points associated with Figure 6 (Effect of varying concentrations of amiloride on activity of tNhe3a). Each individual data point is relative to the mean of the control (DMSO) which was normalized to 100% activity.

## Supplemental Tables

**Supplemental Table S1.** Sequences of primers and gene accession numbers used for cloning *nhe3a* and *nhe3b* from rainbow trout, *Oncorhynchus mykiss*. Restriction enzyme sites used in cloning are underlined.

| Gene         | Primer Set          | Accession Number | Primer  | Primer Sequence (5'– 3')                                   |
|--------------|---------------------|------------------|---------|------------------------------------------------------------|
| <i>nhe3a</i> | 1 <sup>st</sup> set | NM_001130995.1   | Forward | T <u>ACCCGGG</u> ATGGCATGCAGAACTTGC                        |
|              |                     |                  | Reverse | CGC <u>GTCGAC</u> AAAATGACATAACATGAAATTACAC                |
| <i>nhe3a</i> | 2 <sup>nd</sup> set | NM_001130995.1   | Forward | A <u>AGAATTC</u> GCTAGCGCCACCATGGCATGCAGAACTTGCCTCTG       |
|              |                     |                  | Reverse | CCG <u>GAATTC</u> ACCGGTCCAAAATGACATAACATGAAATTACA         |
| <i>nhe3b</i> | 1 <sup>st</sup> set | NM_001160482.1   | Forward | CCAAGATTGATCAAAGCTCAAG                                     |
|              |                     |                  | Reverse | AAAGAGGTCAGTTTGTGGA                                        |
| <i>nhe3b</i> | 2 <sup>nd</sup> set | NM_001160482.1   | Forward | T <u>ACCCGGG</u> ATGCCAGCTCTG                              |
|              |                     |                  | Reverse | CGT <u>GTCGAC</u> CTTGTGGGTTCC                             |
| <i>nhe3b</i> | 3 <sup>rd</sup> set | NM_001160482.1   | Forward | A <u>AGAATTC</u> GCTAGCGCCACCATGCCAGCTCTGTGGCGCTCCACTTTTCG |
|              |                     |                  | Reverse | CCG <u>GAATTC</u> GACCGGTCCCTTGTGGGTTCCCTGACCCTGTCCGTC     |

**Supplemental Table S2.** Percent identity of trout amino acid sequences Nhe3a and trout Nhe3b with other NHEs.

|                 | Trout_Nhe3a | Trout_Nhe3b | Zebrafish_Nhe3a | Zebrafish_Nhe3b | Human_NHE3 | Squalus_Nhe3 | Human_NHE1 |
|-----------------|-------------|-------------|-----------------|-----------------|------------|--------------|------------|
| Trout_Nhe3a     | 100.00      | 78.77       | 66.44           | 61.80           | 57.66      | 55.48        | 35.19      |
| Trout_Nhe3b     |             | 100.00      | 64.37           | 63.95           | 55.67      | 53.62        | 35.05      |
| Zebrafish_Nhe3a |             |             | 100.00          | 65.41           | 53.46      | 52.62        | 33.60      |
| Zebrafish_Nhe3b |             |             |                 | 100.00          | 48.75      | 48.52        | 33.85      |
| Human_NHE3      |             |             |                 |                 | 100.00     | 73.35        | 38.40      |
| Squalus_Nhe3    |             |             |                 |                 |            | 100.00       | 38.52      |
| Human_NHE1      |             |             |                 |                 |            |              | 100.00     |
